# Supplementary material for: Specific inflammatory osteoclast precursors induced during chronic inflammation give rise to highly active osteoclasts associated with inflammatory bone loss
Source: PubMed Central journal article supplement (PMC8993801; doi:10.1038/s41413-022-00206-z), 2022-04-08
Supplement: 41413_2022_206_MOESM1_ESM.pdf [file 41413_2022_206_MOESM1_ESM.pdf]

## Supplementary Figures

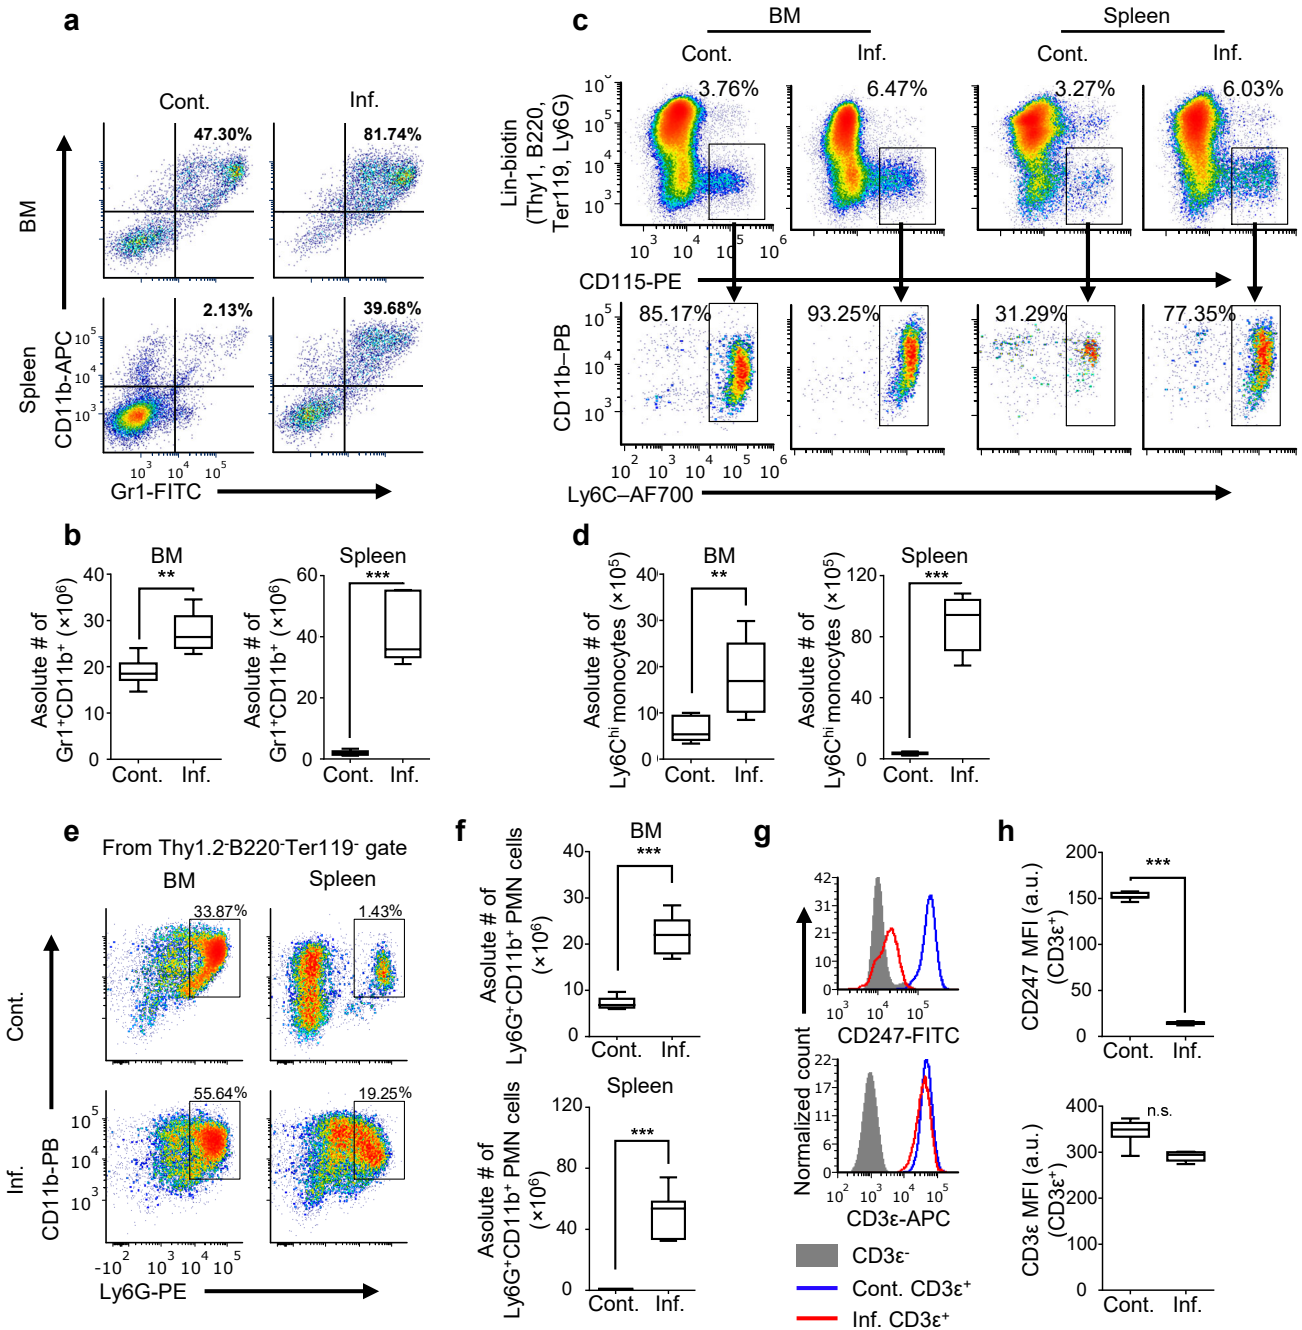

**Fig. S1** Continuous immune stimulation elicits a general chronic inflammation. **a**. Representative plots of the general Gr1<sup>+</sup>CD11b<sup>+</sup> MDSC population in the BM and spleen of control and inflamed mice. **b**. The absolute number of MDSCs in the BM and spleen of inflamed vs. control mice. **c**. The distribution of Lin<sup>-</sup>(Thy1<sup>-</sup>B220<sup>-</sup>Ter119<sup>-</sup>Ly6G<sup>-</sup>) CD115<sup>+</sup>Ly6C<sup>hi</sup>CD11b<sup>+</sup> (Ly6C<sup>hi</sup> monocytes) in the BM and the spleen. **d**. Absolute number of Ly6C<sup>hi</sup> monocytes in the BM and spleen. **e**. The distribution of Ly6G<sup>+</sup>CD11b<sup>+</sup> PMN-MDSC in the BM and spleen of control and inflamed mice. **f**. Absolute number of Ly6G<sup>+</sup>CD11b<sup>+</sup> PMN-MDSCs in the BM and spleen. **g**. Representative histograms of CD247 and CD3ε expression by splenic T-cells. **h**. Quantitation of CD247 and CD3ε expression in control and inflamed Splenic T-cells, presented as mean fluorescence intensity (MFI) in arbitrary units (a.u.). Line: median, box: 25<sup>th</sup>-75<sup>th</sup> percentile, whiskers: range. Control N=8, inflamed N=8. \*\* P<0.01, \*\*\* P<0.001 (Mann-Whitney test).

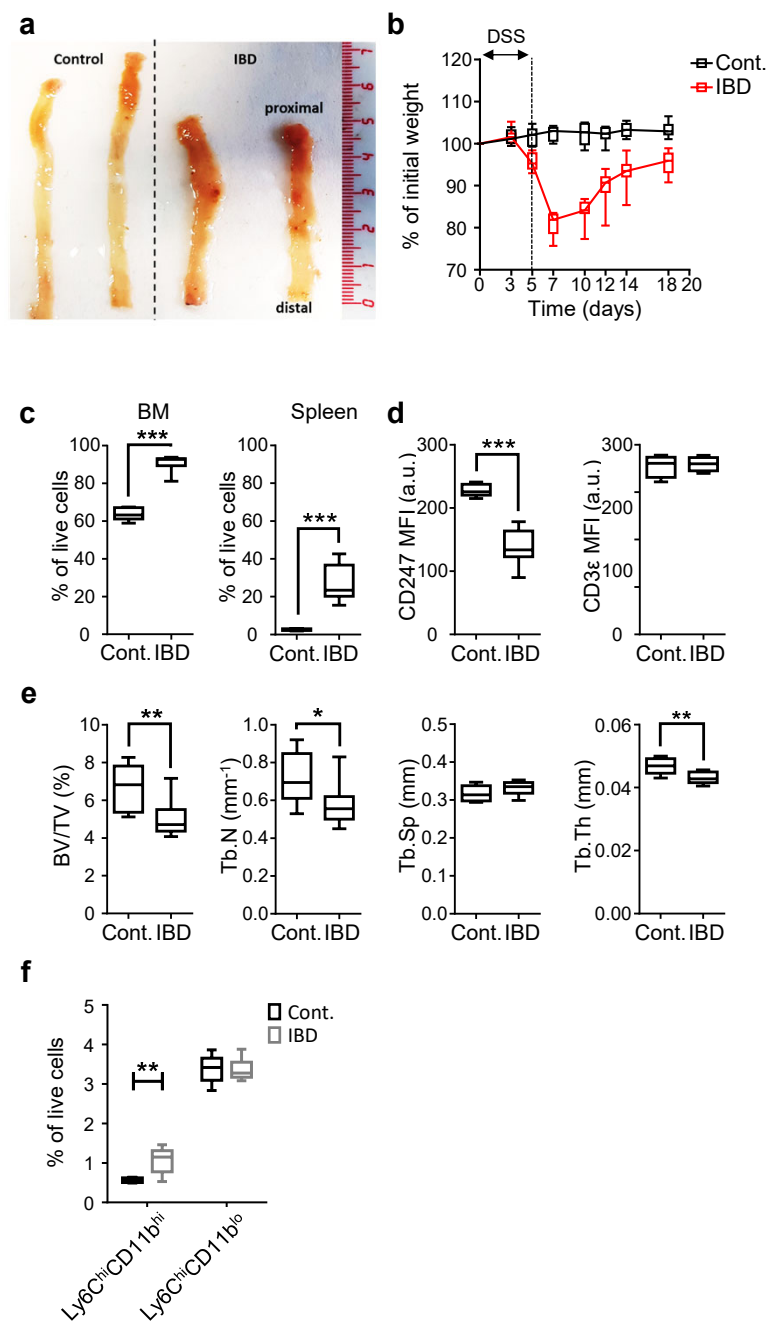

**Fig. S2** Chronic inflammation in IBD leads to bone loss and iOCP but not hOCP accumulation in the BM. **a.** Representative colons of control and IBD mice at endpoint (scale in cm). **b.** Weight change during and after a 5-day DSS treatment, mice were sacrificed at day 19. **c.** The fraction of Gr1<sup>+</sup>CD11b<sup>+</sup> MDSCs in the BM and the spleen. **d.** CD247 and CD3ε expression in splenic T-cells. **e.** Trabecular measurements: BV/TV, Tb.N, Tb.Sp and Tb.Th. **f.** The fraction of Ly6C<sup>hi</sup>CD11b<sup>hi</sup> and Ly6C<sup>hi</sup>CD11b<sup>lo</sup> in the BM of control vs. IBD mice. Control N=8, IBD N=8, representative results of 2 independent experiments. Line: median, box: 25<sup>th</sup>-75<sup>th</sup> percentile, whiskers: range. \*  $P < 0.05$ , \*\*  $P < 0.01$ , \*\*\*  $P < 0.001$  (Mann-Whitney test and Holm multiplicity correction).



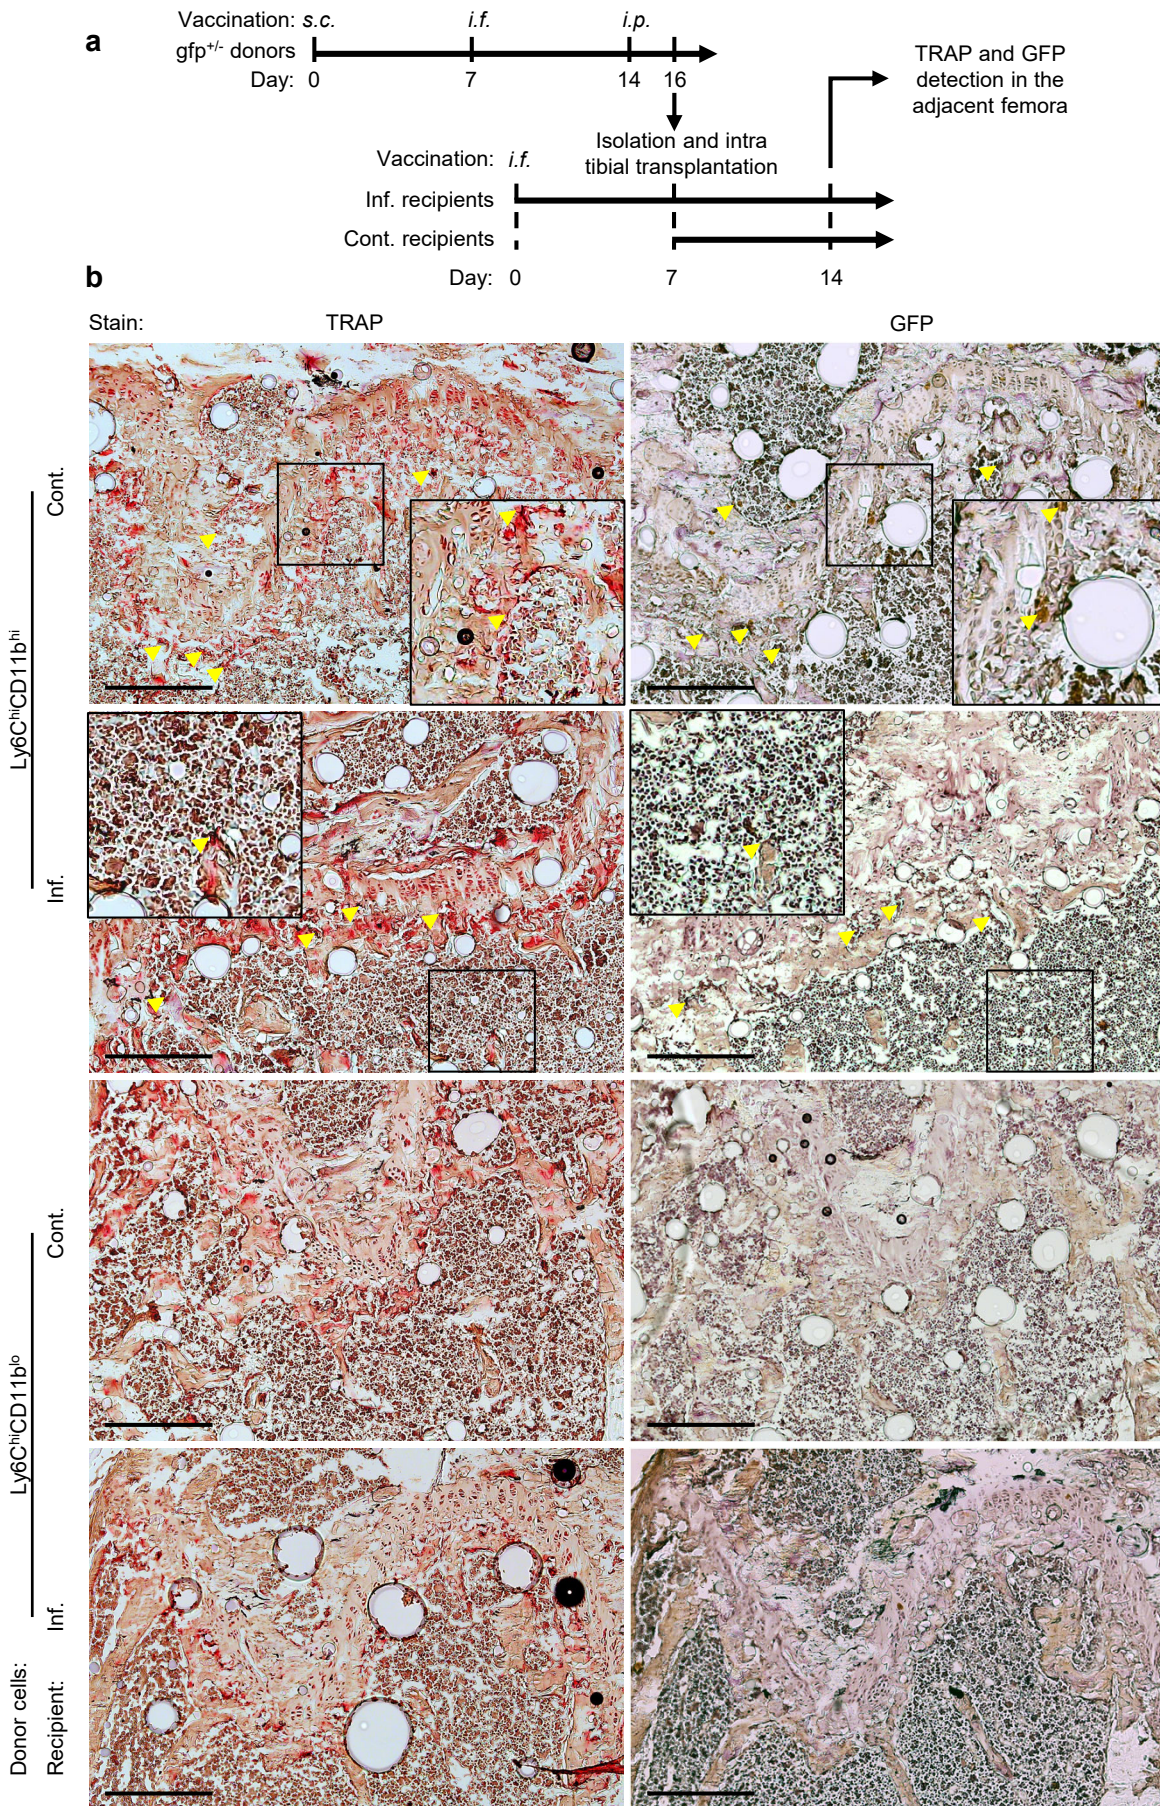

**Fig. S3** Ly6C<sup>hi</sup>CD11b<sup>hi</sup> and Ly6C<sup>hi</sup>CD11b<sup>lo</sup> give rise to OCs *in vivo*. **a.** Sorted 10<sup>6</sup> Ly6C<sup>hi</sup>CD11b<sup>hi</sup> or Ly6C<sup>hi</sup>CD11b<sup>lo</sup> from BM of inflamed  $gfp^{+/-}$  donor mice were injected to the right tibiae of inf. WT recipient mice 7 days after a single *i.f.* vaccination (left foot pad), or to sex/age matched cont. mice. Recipient mice were sacrificed 7 days after the transplantation. **b.** TRAP staining (left panel) and GFP immunohistochemistry (right panel) of 7 $\mu$ m consecutive sections from the right femora of the recipient mice. Black frames are digitally enlarged, locations positive for both TRAP and GFP are marked by yellow arrows. Scale bar 400 $\mu$ m.



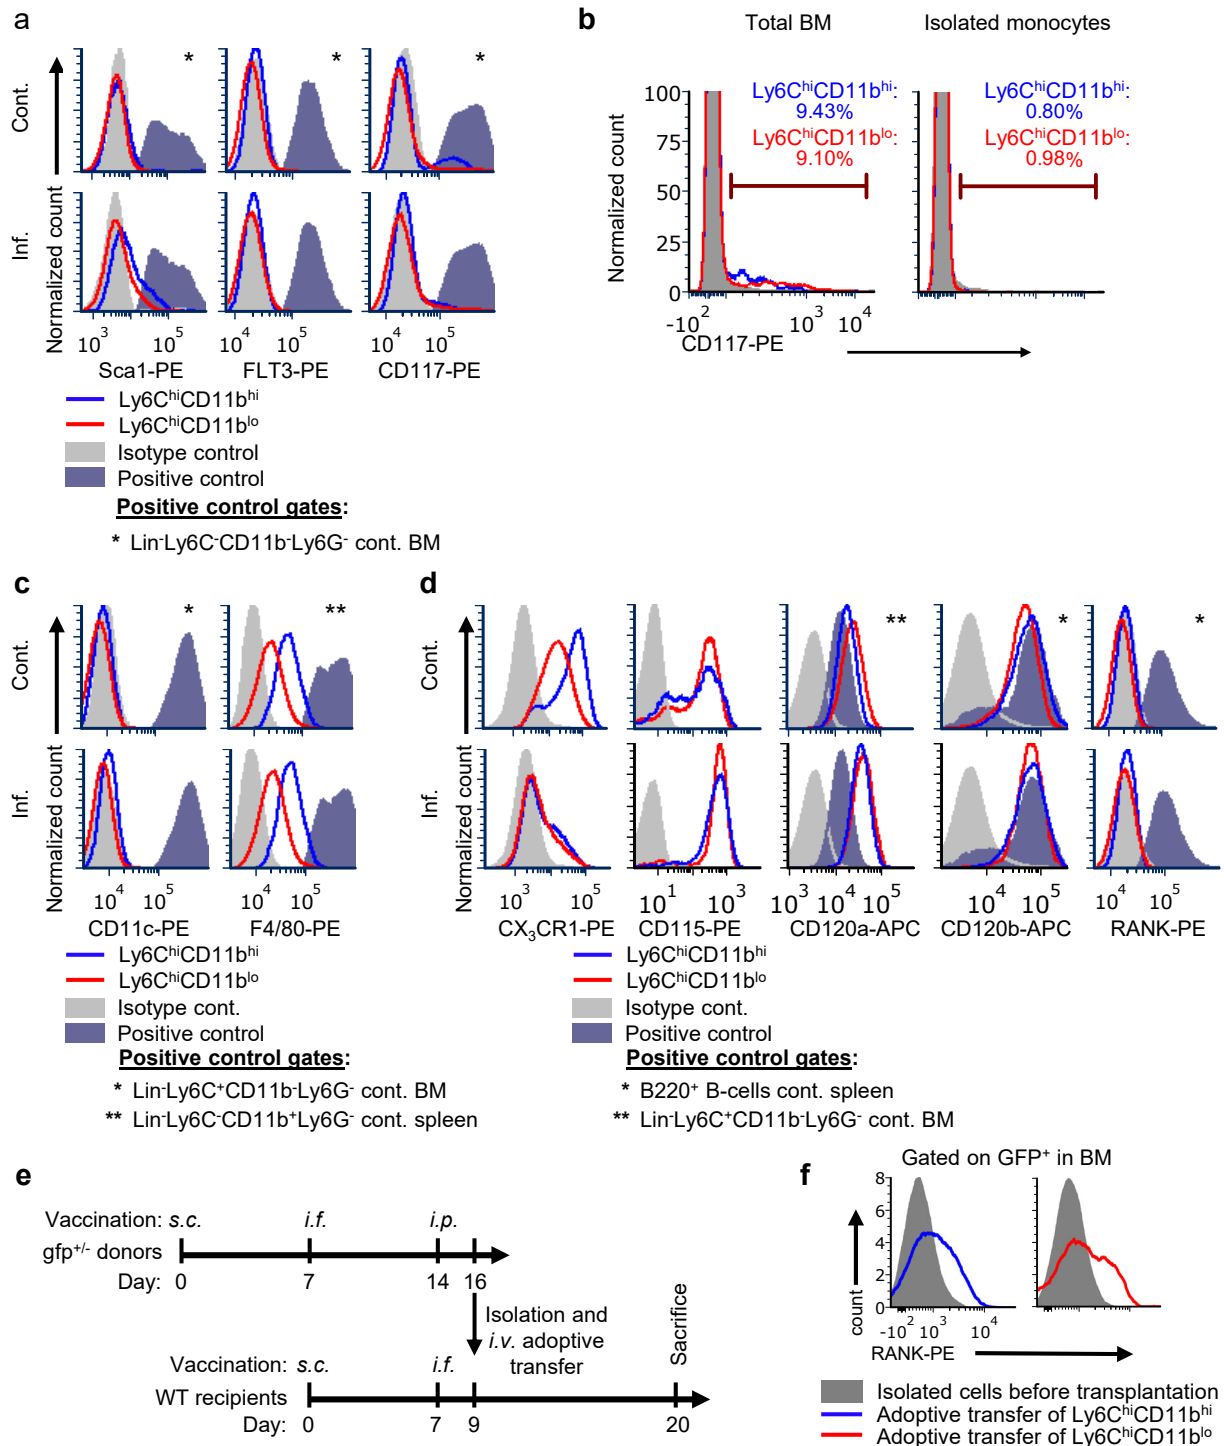

**Fig. S4** Expression of known OCP surface markers in Ly6C<sup>hi</sup>CD11b<sup>hi</sup> and Ly6C<sup>hi</sup>CD11b<sup>lo</sup>. A phenotypical screen of surface markers expressed by Ly6C<sup>hi</sup>CD11b<sup>hi</sup> and Ly6C<sup>hi</sup>CD11b<sup>lo</sup> in the BM of inflamed and control mice. Isotype control is depicted as gray filled area and positively stained internal controls are depicted as blue-gray filled areas (gates and samples of positive controls are indicated by asterisks). **a**. Stem cell and myeloid progenitor markers Sca1, FLT3 and CD117. **b**. CD117<sup>+</sup> cells are depleted from isolated monocytes (used in all the following *ex vivo* experiments). **c**. Myeloid differentiation markers CD11c and F4/80. **d**. Expression of the known OCP markers CX<sub>3</sub>CR1, CD115 and the two TNF- $\alpha$  receptors 1 and 2 (CD120a and CD120b, respectively) and RANK, by Ly6C<sup>hi</sup>CD11b<sup>hi</sup> and Ly6C<sup>hi</sup>CD11b<sup>lo</sup> in control and inflamed mice. **e**. Sorted 2.5 $\times$ 10<sup>6</sup> Ly6C<sup>hi</sup>CD11b<sup>hi</sup> or Ly6C<sup>hi</sup>CD11b<sup>lo</sup> from BM of inflamed *gfp*<sup>+/-</sup> donor mice were injected *i.v.* to inflamed WT recipient mice on day 9 of the vaccination treatment, recipient mice were sacrificed on day 20. **f**. RANK expression in Ly6C<sup>hi</sup>CD11b<sup>hi</sup> and Ly6C<sup>hi</sup>CD11b<sup>lo</sup>, sorted from *gfp*<sup>+/-</sup> mice, before adoptive transfer and in the BM of recipient mice 11 days after adoptive transfer.

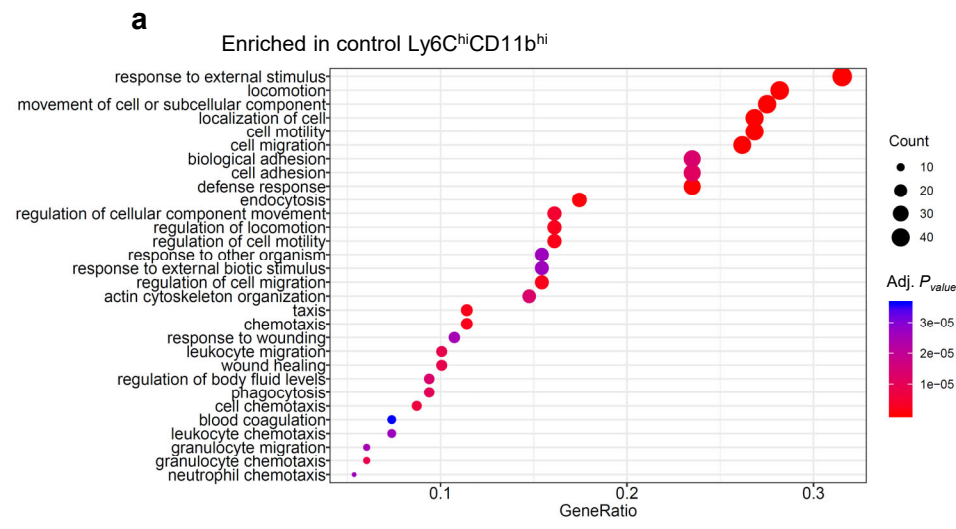

**Fig. S5** Enriched biological process categories for Ly6C<sup>hi</sup>CD11b<sup>hi</sup> and Ly6C<sup>hi</sup>CD11b<sup>lo</sup>. **a.** Enriched in control Ly6C<sup>hi</sup>CD11b<sup>hi</sup> (PC1 bottom 5% loading scores). **b.** Enriched in inflamed Ly6C<sup>hi</sup>CD11b<sup>lo</sup> (PC1 top 5% loading scores). **c.** Enriched in inflamed Ly6C<sup>hi</sup>CD11b<sup>hi</sup> (PC2 bottom 5% loading scores). **d.** Enriched in control Ly6C<sup>hi</sup>CD11b<sup>lo</sup> (PC3 top 5% loading scores). Benjamini-Hochberg FDR was set to 0.05. Uniprot biological process GO terms were used. Symbol size represents the number of proteins mapped to each category (count). Adjusted *P*-value is color coded.

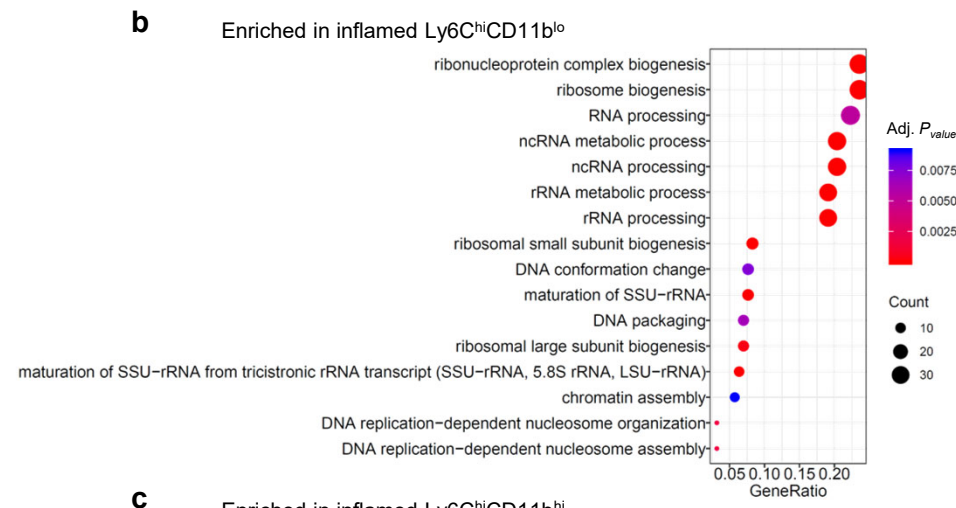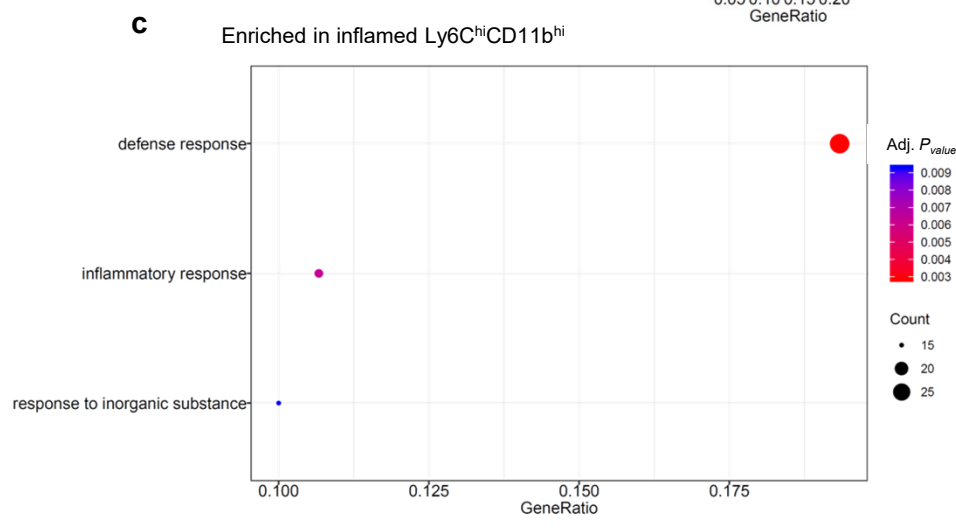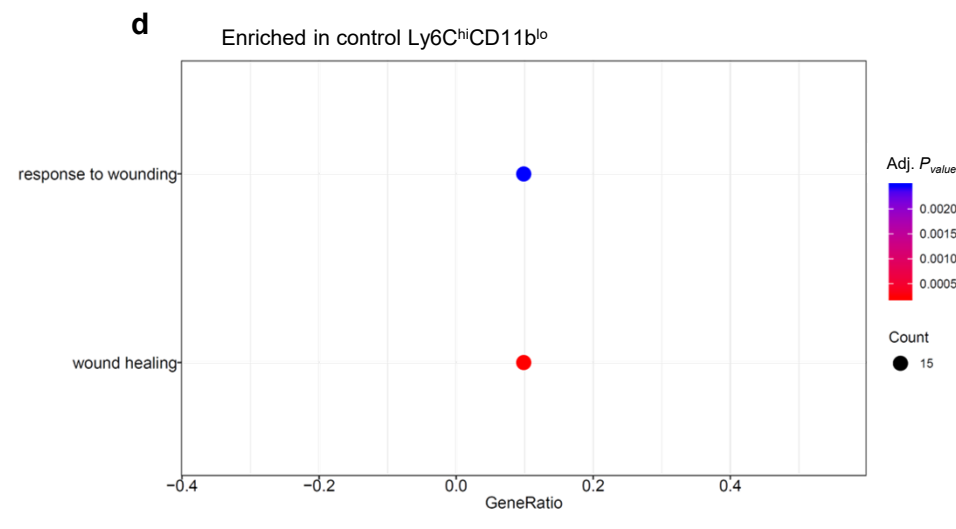

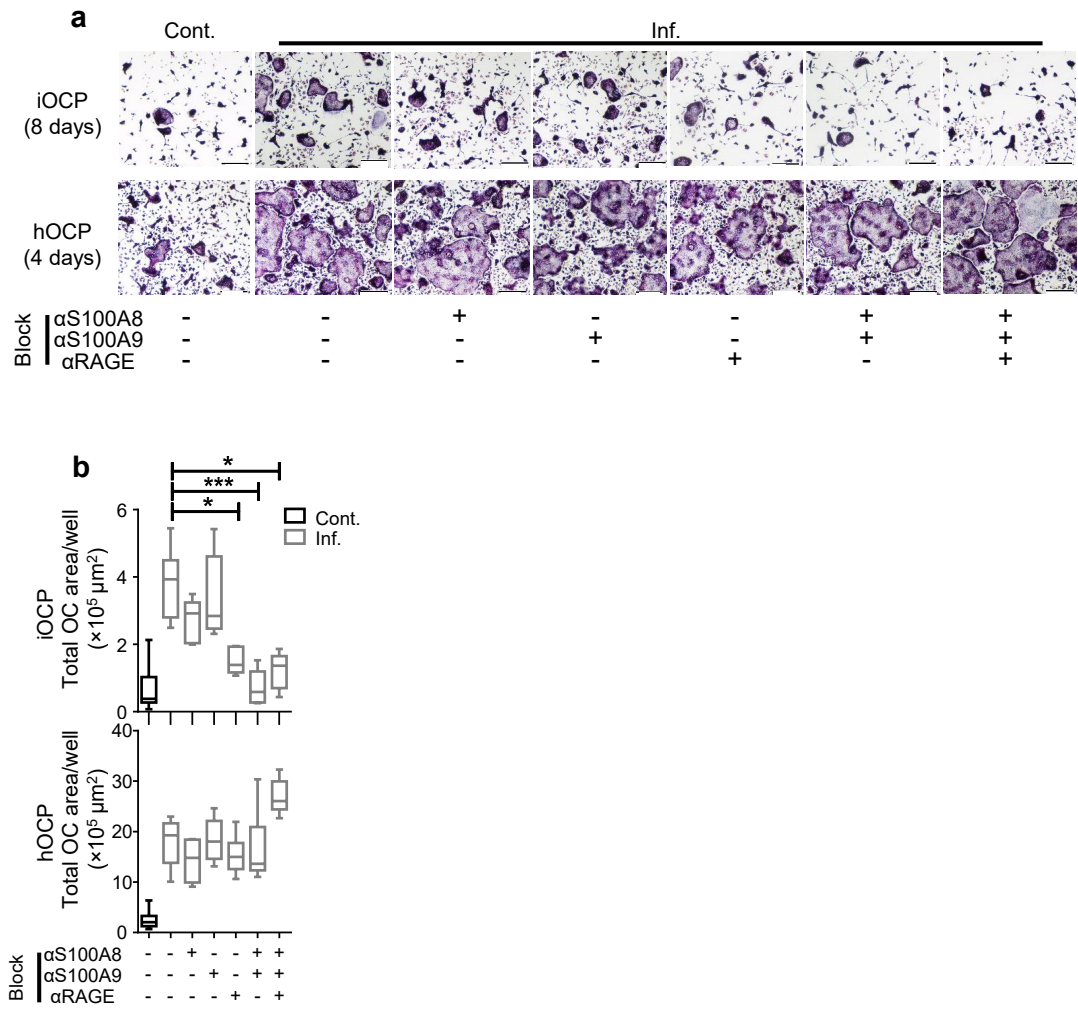

**Fig. S6** The RAGE-S100A8/A9 axis controls OC differentiation from iOCPs but not from hOCPs. **a.** Sorted  $10^4$  iOCPs and hOCPs from BM of inflamed mice were cultured in OC differentiation medium for 8 and 4 days, respectively with blocking antibodies for S100A8, S100A9 and RAGE, in combinations as indicated (200 $\mu$ m bar). **b.** OC area quantitation. iOCPs and hOCPs from BM of control mice are presented in black. N=5 for each group, representative results of 2 independent experiments. Line: median, box: 25<sup>th</sup>-75<sup>th</sup> percentile, whiskers: range. \*  $P < 0.05$ , \*\*  $P < 0.01$ , \*\*\*  $P < 0.001$  (Kruskal-Wallis test and Dunn post test).
